1 **Gaussian-Enveloped Tones (GET): a vocoder that can simulate pulsatile**  
2 **stimulation in cochlear implants**

3

4 Qinglin Meng,<sup>a)</sup> and Huali Zhou<sup>c)</sup>

5 *Acoustics Laboratory, School of Physics and Optoelectronics, South China University of*  
6 *Technology, Guangzhou, Guangdong 510641, China*

7 Thomas Lu, and Fan-Gang Zeng<sup>b)</sup>

8 *Center for Hearing Research, Department of Otolaryngology –Head and Neck Surgery,*  
9 *University of California, Irvine, California 92697, USA*

10

11 Running title: Acoustic simulations of cochlear implants

12

13 This paper is submitted for consideration for a special issue on Reconsidering Classic Ideas in  
14 Speech Communication on the Journal of the Acoustical Society of America

15

16 Submission date: Dec. 19, 2021

17

---

<sup>a)</sup> Electronic mail: mengqinglin@scut.edu.cn. ORCID: 0000-0003-0544-1967.

<sup>b)</sup> Electronic mail: fzeng@uci.edu. ORCID: 0000-0002-4325-2780

<sup>c)</sup> Also at: College of Electronics and Information Engineering, Shenzhen University, Shenzhen, Guangdong, 518060, China

18  
19  
20  
21  
22  
23  
24  
25  
26  
27  
28  
29  
30  
31  
32  
33  
34  
35

## ABSTRACT

Acoustic simulations of cochlear implants allow comprehensive evaluation of not only perceptual performance under impoverished listening conditions but also relative contributions of classical spectral and temporal cues to speech recognition. Conventional simulations use continuous sinusoidal or noise carriers, lacking the vital pulsatile characteristics in a typical cochlear-implant processing strategy. The present study employed Gaussian-enveloped tones (GETs) as a discrete carrier to simulate the electric pulse train in modern cochlear implants. Two types of GET vocoders were implemented and evaluated in normal-hearing listeners to compare their performance to actual cochlear-implant performance. In the first implementation, GETs with different durations were used to simulate electric current interaction across channels that produced vowel and consonant recognition similar to the actual cochlear-implant result. In the second implementation, a direct mapping from electric pulses to GETs was developed to simulate a widely-used clinical *n-of-m* strategy in cochlear implants. The GET processing simulated the actual implant speech in noise perception in terms of the overall trend, the absolute mean scores, and their standard deviations. The present results demonstrated that the pulsatile GET vocoders simulate the cochlear implant performance more accurately than the conventional sinusoid or noise vocoders.

## 36 I. INTRODUCTION

37 Vocoders as a means of speech synthesis have a long and rich history. At the 1939 New  
38 York World’s Fair, Homer Dudley of Bell Labs demonstrated his vocoder invention that can  
39 “remake speech” automatically and instantaneously (18-ms delay) by controlling energy in 10  
40 frequency bands (from 0 to 3000 Hz) that contained either buzz-like tone or hiss-like noise  
41 carriers ([Dudley, 1939](#)). He realized then that “not only can the speech be remade to simulate  
42 the original but it can be changed from the original in a variety of ways” to study experimentally  
43 the relative contributions of the fundamental parameters in speech synthesis and recognition. He  
44 found that “good intelligibility” can be achieved by controlling “only low syllabic frequencies  
45 of the order of 10 cycles per second”, whereas “the emotional content of speech” can be  
46 controlled by altering the frequency of the buzzing tones. The relationship of vocoders to speech  
47 production has been firmly established by Gunner Fant as the source-filter model ([Fant, 1970](#)),  
48 whereas that to speech perception remains relatively unclear but is highly relevant to the success  
49 and limitation of modern multi-channel cochlear implants or CIs ([Zeng, 2017](#)). The present  
50 study has developed a novel vocoder that improves not only acoustic simulation of CIs but also  
51 understanding of the relationship between vocoders and speech perception.

52 The early multi-channel CIs followed closely Dudley’s original vocoder idea by  
53 extracting and delivering speech fundamental frequency (F0) in the form of electric pulse rate,  
54 and one or two formants (F2 or F1/F2) in the form of electrode position ([Tong et al., 1980](#);  
55 [Skinner et al., 1991](#)). The speech understanding of the early CIs was relatively low (<50%  
56 correct for sentence recognition in quiet) because of crude F0 and formant extraction methods  
57 (i.e., zero crossing) at that time and poor correspondence between sound frequency and electrode  
58 position, which remains a significant issue in CI today. Contemporary CIs have all adopted

59 speech processing strategies that extract band-specific temporal envelope from 8-20 frequency  
60 bands and use the envelope to amplitude modulate a continuous, but fixed high-rate (at least 2  
61  $\times$  the highest envelope frequency) pulse train, which is then delivered to a corresponding  
62 electrode in an interleaved fashion without any two electrodes being stimulated simultaneously  
63 (Wilson, 1991; Skinner, 2002). In one popular implementation called the *n-of-m* strategy, the  
64 number of frequency bands (*m*) is greater than the number of stimulating electrodes (*n*), which  
65 typically corresponds to the *n* frequency bands with the maximal energy (e.g., Zeng *et al.*, 2008).  
66 These advances in multi-channel CIs have produced 70-80% correct sentence recognition in  
67 quiet, which is sufficient for an average user to carry on a conversation without lipreading.

68 Acoustic simulations of CIs have been developed and widely used (Svirsky *et al.*, 2021)  
69 for at least three reasons. First, acoustic simulations minimize the effect of large CI individual  
70 variability, which may confound or mask the relative importance of speech processing  
71 parameters (e.g., Skinner 2002). Second, acoustic simulations allow evaluation of relative  
72 contributions of different cues to auditory and speech perception (e.g., Singh *et al.*, 2009; Xu *et*  
73 *al.*, 2005). Third, acoustic simulations allow a normal-hearing listener to appreciate the quality  
74 of CI processing and the degree of difficulty facing a typical CI user. Traditionally, acoustic  
75 simulations of CIs have used either noise- (Shannon *et al.*, 1995) or sinusoid-excited (Dorman  
76 *et al.*, 1997) vocoders, in which the noise or sinusoid simulates the continuous electric pulse  
77 train while the number of frequency bands and their overlaps simulates the limited number of  
78 electrodes and their current spread and other characteristics (e.g., Shannon *et al.*, 1998). A  
79 significant drawback of these traditional vocoder models is the lack of simulation of the pulsatile  
80 nature of electric stimulation. Several studies have attempted to develop acoustic models that  
81 simulate pulsatile electric stimulation, such as filtered noise bursts (Blamey *et al.*, 1984a, 1984b),

82 filtered harmonic complex tones (Deeks and Carlyon, 2004), and pulse-spread harmonic  
83 complexes (Hilkhuisen and Macherey, 2014; Mesnildrey *et al.*, 2016). However, these methods  
84 are limited in their ability to simulate three important features in modern CIs. First, these  
85 vocoders cannot simulate the discrete nature of pulsatile stimulation on a pulse-by-pulse basis.  
86 Second, they do not allow independent manipulation of the overlap between spectral and  
87 temporal representation. Third, it is difficult for vocoders with continuous carriers to simulate  
88 some CI speech processing strategies, e.g., *n-of-m*, in which the low-energy bands are  
89 abandoned to produce disrupted temporal envelopes.

90 Here we identified the Gabor atom (Gabor, 1947), also known as the Gaussian-enveloped  
91 tone (GET), as a means of simulating the three features of modern CI processing. The GET has  
92 been used to study a wide range of auditory phenomena including interaural timing difference  
93 using temporal envelope cues (Buell and Hafter, 1988; Bernstein and Trahiotis, 2002), intensity  
94 discrimination (van Schijndel *et al.*, 1999), and cortical encoding of acoustic and electric pulsatile  
95 stimulation (Johnson *et al.*, 2017). Because Gaussian envelope is preserved in both time and  
96 frequency domains, the GET can be used to simulate and control accurately the discrete pulses  
97 and their current spread, producing reasonable CI simulation in binaural masking release and  
98 binaural image (Lu *et al.*, 2007; Lu *et al.*, 2010; Goupell *et al.*, 2013; Kan *et al.*, 2013). Here we  
99 first analyzed how to use the GET to simulate pulsatile stimulation in CIs and demonstrated its  
100 unique advantage in simultaneous and accurate manipulation and control of the spectral spread  
101 and temporal resolution. We also simulated the pulsatile timing, amplitude compression and  
102 quantization in a typical *n-of-m* strategy. Speech performance of the GET vocoder was obtained  
103 and compared to that obtained in the actual CI users and traditional noise- or sinusoid-excited  
104 vocoders.

## 105 II. VOCODERS AND EXPERIMENT METHODS

106 Fig. 1A shows the traditional acoustic simulation of CI using either noise ([Shannon \*et al.\*, 1995](#)) or  
107 sinewave vocoders ([Dorman \*et al.\*, 1997](#)). The output filters can be used to control the  
108 current spread, but no temporal separation feature can be simulated. Fig. 1B shows the proposed  
109 pulsatile acoustic simulation using GET vocoders (the first type; see Section II.B; used in  
110 Experiment 1). The effective duration of the Gaussian envelope can be used to control the current  
111 spread. Meanwhile, the temporal separations between electric pulses can be simulated by the same  
112 separations between the center times of the Gaussian-enveloped tone pulses, although the spectral  
113 spread and temporal separations are not independent of each other. Fig. 1C (the second type; see  
114 Section II.C; used in Experiment 2) shows a variation of Fig. 1B, which considers a common  
115 feature of temporal-frame-based  $n$ -of- $m$  selection in some CI processing strategies. The  $n$ -of- $m$   
116 selection means  $n$  maximum envelope values are selected out of the envelope values from the  $m$   
117 input channels. The amplitude compression and quantization which are widely used in modern  
118 CIs can also be simulated in Fig. 1C. For all the three methods, their front-end processing can  
119 share the same blocks of bandpass filters and envelope extraction, e.g., in a traditional temporal  
120 envelope based continuous interleaved sampling (CIS) CI strategy ([Wilson, \*et al.\*, 1991](#)), as the  
121 figure shows.

122 In the following, Section II.A analyzes the theory of using the Gabor atom or Gaussian  
123 enveloped tone for the simulation of electric pulses; Section II.B and C introduces the detailed  
124 experiment methods to validate the two types of GET vocoders (see Fig.1B and 1C) respectively  
125 in comparison with both actual CI listeners and conventional continuous-carrier vocoders (see  
126 Fig. 1A).

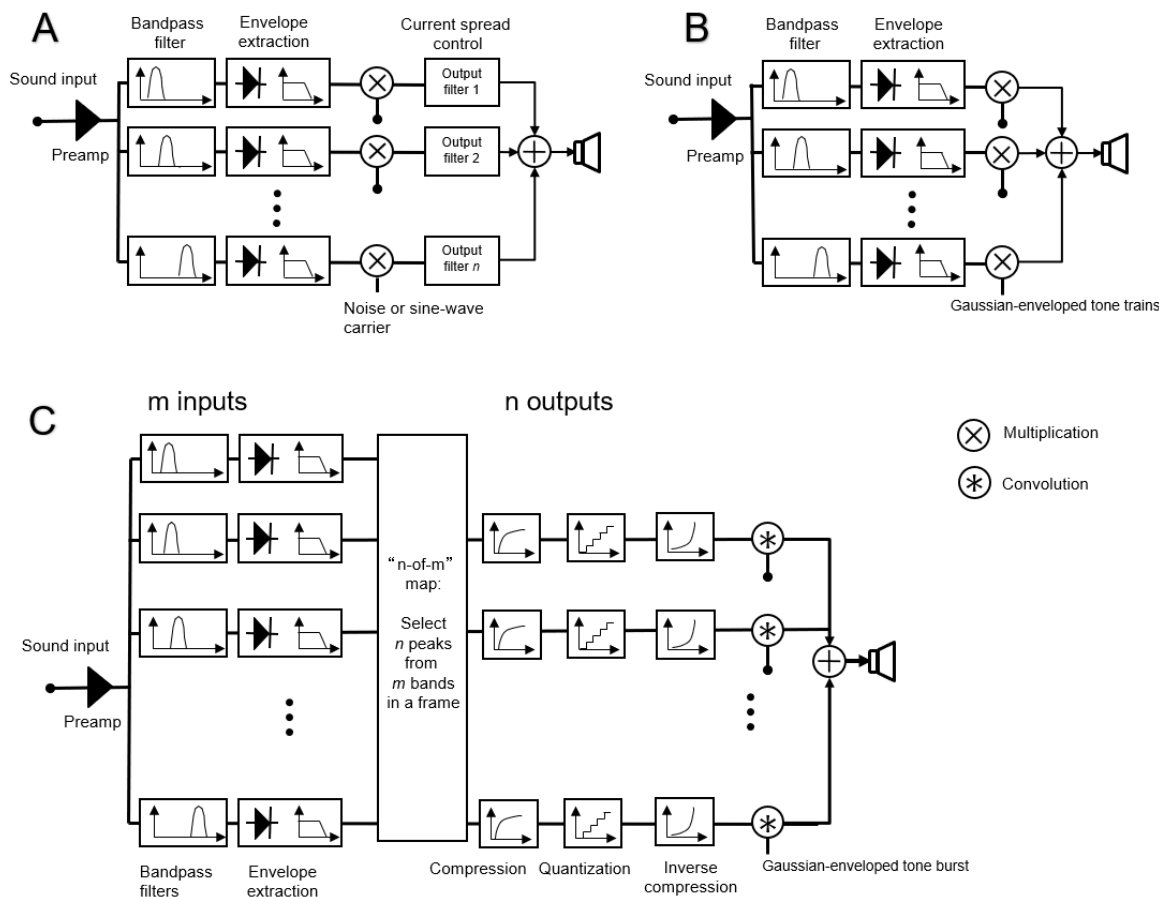

**FIG. 1.** Block diagrams of standard channel vocoder (A) and the proposed pulsatile simulation vocoders with (B) or without (C) considering the  $n$ -of- $m$  feature. The pulsatile vocoders are using GETs as carriers or using single GET as an impulse response. The front-end pre-amplification, bandpass filter, and envelope extraction can be implemented either in temporal or spectral domain.

127

128 **A. Simulation of pulsatile stimulation**

129

A Gaussian function is symmetrical in the time domain:

130

$$g_{env}(t) = ae^{-\frac{\pi(t-t_0)^2}{2\sigma^2}} \quad (1)$$

131

where  $a$  determines the function's maximum amplitude,  $t_0$  the maximum amplitude's

132

temporal position, and  $\sigma$  the effective duration or  $D = \sqrt{2}\sigma$ , at which the amplitude is 6.82-dB

133

down from the maximum amplitude. Its Fourier transform is:

134 
$$G_{env}(f) = \sqrt{2}a\sigma \cdot e^{-2\pi(\sigma f)^2} \cdot e^{-j2\pi f t_0} \quad (2)$$

135 The shape of its amplitude spectrum,  $\sqrt{2}a\sigma \cdot e^{-2\pi(\sigma f)^2}$ , is also a Gaussian function with an  
 136 effective bandwidth being  $B = \frac{1}{\sqrt{2}\sigma}$  between the 6.82-dB down cutoff frequencies.

137 The effective duration ( $D$ ) and the effective bandwidth ( $B$ ) can be traded:

138 
$$D \cdot B = 1 \quad (3)$$

139 meaning that increasing the duration will narrow the bandwidth and vice versa.

140 Acoustic simulation of a single electric pulse in a frequency channel can be generated by  
 141 multiplying the above Gaussian function to a sinusoidal carrier:

142 
$$s(t) = g_{env}(t) \cdot \sin(2\pi f_c t + \varphi_0) = a e^{-\frac{\pi(t-t_0)^2}{2\sigma^2}} \cdot \sin(2\pi f_c t + \varphi_0), \quad (4)$$

143 where  $s(t)$  has the same effective duration and effective bandwidth as  $g_{env}(t)$  except for  
 144 changing the center frequency from 0 to  $f_c$ , and  $\varphi_0$  is an initial phase.

145 Fig. 2 illustrates both waveform (A) and spectrum (B) of a unit-amplitude Gaussian-  
 146 enveloped single pulse. The carrier frequency is 5 kHz. Acoustic simulation of a continuous

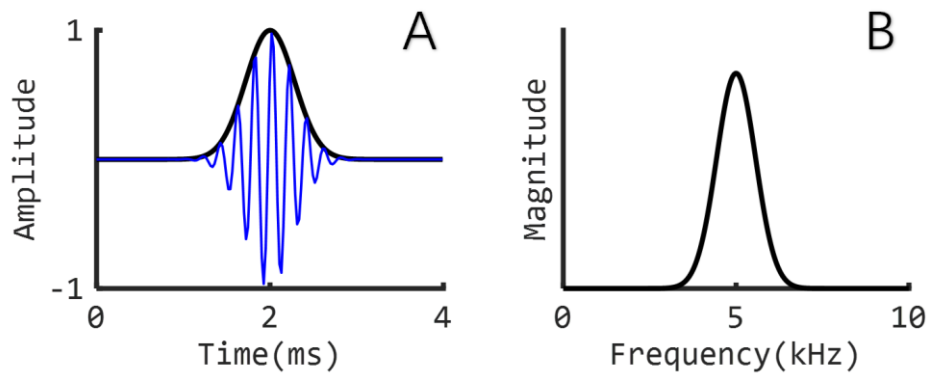

**FIG. 2.** (Color online) A unit-amplitude single pulse with Gaussian-shaped envelope (black line) in both the time (left panel) and frequency (right panel) domains. The carrier frequency is 5kHz (the blue waveform in the left panel and the frequency with maximum amplitude in the right panel). The  $\sigma$  is 0.5 ms in Eq. (1), producing an effective duration of 0.7 ms and an effective bandwidth of 1.4 kHz.



147 electric pulse train can be constructed by periodically repeating  $s(t)$ , with the period determining  
 148 the pulse rate of the simulated pulse train.

149 Different from the CI electric pulses with constant duration at the order of tens of  
 150 microseconds, the GET duration should be much longer that containing at least several periods  
 151 of the tone carrier. Therefore, the carrier period or frequency will determine the lower limits of  
 152 the GET duration. Fig. 3 illustrates the interaction of the GET duration (bandwidth), pulse rate,  
 153 and carrier frequency. The GET effective bandwidth equals in value to the maximum pulse rate  
 154 that can be transmitted without obvious temporal interaction between neighboring GETs.  
 155 Increasing the duration (i.e., larger  $\sigma$ ) can decrease the bandwidth, but at the same time, the  
 156 maximum rate is also decreased.

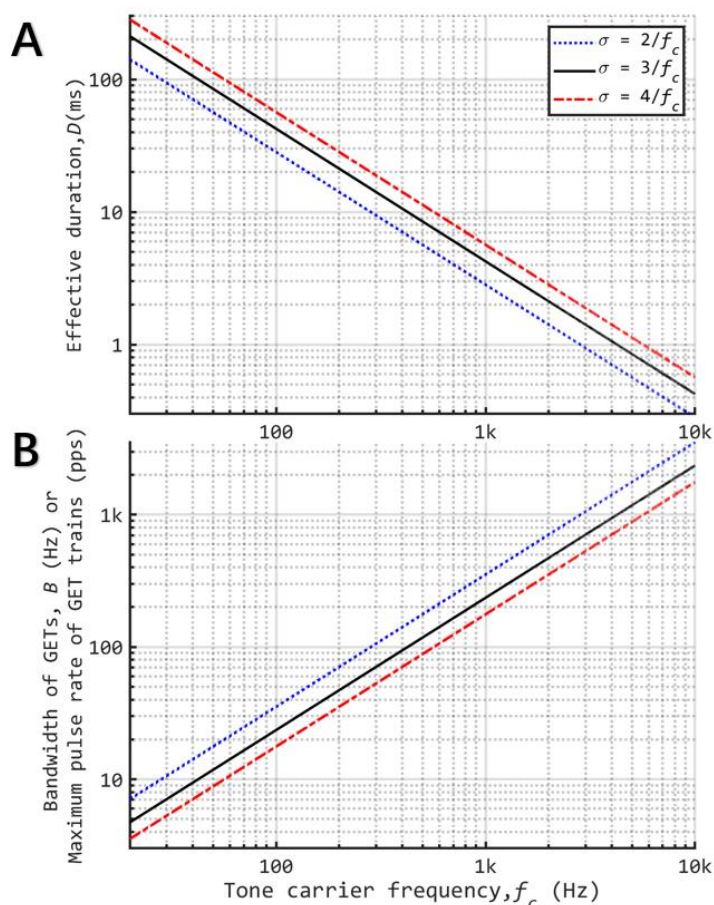

**FIG 3.** (Color online) The relationship between the tone carrier frequency and the effective duration  $D = \sqrt{2}\sigma$  (see Panel **A**) or effective bandwidth  $B = 1/D$  (see Panel **B**) of Gaussian-enveloped tones (GETs). All axes are logarithmic scaling. The  $\sigma$  was assumed to be  $2/f_c$ ,  $3/f_c$ , or  $4/f_c$  to demonstrate the effects of different duration of GETs. For certain combination of  $f_c$  and  $\sigma$ , the maximum GET pulse rate that can be transmitted with no temporal interaction between neighboring GETs is  $1/D$ , which equals to the effective bandwidth in Panel **B**.

157

158           It can be found that 1) a conventional pulse rate of 900 pps could only be simulated with  
159 carrier frequencies above ~3 kHz, 2) for carrier frequencies within the middle frequency range  
160 around 2 kHz, the 900 pps is still possible to be simulated but neighboring GETs have moderate  
161 temporal interaction, 3) for low frequency carrier, the pulsatile feature cannot be guaranteed.  
162 One approach (not used in current experiments) may partially reduce the temporal interactions,  
163 like upward shifting the carrier frequency or reducing the pulse rate.

164           In short, the GETs can simulate and manipulate five important parameters of CI processing  
165 or stimulation: (1) the pulse rate by changing the period of the pulse generation, (2) the temporal  
166 envelope (including its compression and quantization) by changing the amplitude of individual  
167 GETs in a pulse train within a channel, (3) the spectral envelope by changing the GET amplitude  
168 across channels, (4) the place of excitation by changing the carrier tone frequency, and (5) the  
169 spread of excitation by changing the effective bandwidth in GETs. The precise manipulation of  
170 these five important parameters allows acoustic simulation of modern CIs using pulsatile electric  
171 stimulation. The limitations from the dependent relationships between duration, bandwidth, and  
172 carrier frequency of the GETs were discussed as above and should be taken care of during  
173 algorithm design and experiments of CI simulations with GETs.

## 174 **B. Experiment 1: Simulation of Current Spread**

175           There is a significant difference in simulating the spread of excitation between the standard  
176 vocoder and the GET implementation. In the standard simulation, the spread of excitation is  
177 manipulated by changing the filter type and the bandwidth of the synthesis filters at the vocoder  
178 output stage. For the GETs, the spread of excitation is manipulated by increasing or decreasing  
179 the Gaussian tone duration, which produces a corresponding change in narrowing or widening  
180 the spectral bandwidth for each pulse.

181 In Experiment 1, five vocoders were used: three standard vocoders, *sine-wave*, *noise-*  
182 *adjacent*, and *noise-overlap* (Fig. 1A), and two proposed vocoders incorporating the GET  
183 simulation, *GET-adjacent* and *GET-overlap* (Fig. 1B).

184 *Analysis processing of all five vocoders:* the analysis filter banks consist of  $N$  band-pass  
185 filters (4<sup>th</sup> order Butterworth). The frequency spacing for cutoffs for the filter bank was defined  
186 in the range of [80, 7999] Hz according to a Greenwood map ([Greenwood, 1990](#)). The filtered  
187 signals were half-wave rectified and lowpass filtered (50 Hz 4<sup>th</sup> order Butterworth) to extract  
188 the envelope for each channel.

189 *Synthesis processing for the three standard vocoders:* For the *sine-wave* vocoder, a sine  
190 wave with a frequency centered at the corresponding analysis filtering band is used as the carrier.  
191 For the *noise-adjacent vocoder*, bandpass noise carriers were generated by passing white noise  
192 through filters which were the same as the analysis filters. The *noise-adjacent* vocoder provides  
193 upper-bound performance that has a minimum of simulated electrode interaction. For the *noise-*  
194 *overlap* vocoder, low-pass filters (4<sup>th</sup> order Butterworth) were used to pass white noises for  
195 generating lowpass noise carriers. The cutoff frequencies of the low-pass filters were the same  
196 as the upper cutoff frequencies of the analysis filters. The signal carriers in each band were  
197 corresponding lowpass noise. Lowpass filters were chosen to maximize interaction between  
198 channels and provide a lower bound of performance with simple manipulation. For the two noise  
199 vocoders, after modulating each channel of filtered noise with the channel envelope, the output  
200 was filtered again to band-limit each channel. The band-limiting filters are the same as those  
201 used for the noise carrier generation. The final vocoded signal was synthesized by summing up  
202 all channels. A reduced number of bands was simulated by subdividing the frequency space

203 equally by the number of bands. For example, the 2-band vocoder will have two channels  
204 covering the frequency space.

205 *Synthesis processing for the two pulsatile GET vocoders:* For the GET vocoders, instead  
206 of modulating a filtered noise signal at the synthesis stage, the envelope in each channel  
207 modulates the amplitude of the train of GETs. Because the first experiment focused on the  
208 spectral interaction, the pulses among all channels were synchronized, meaning that the  
209 “interleaved sampling” feature was not simulated. Fig. 4 shows a 100-Hz pulse train, repeating  
210 the single pulse every 10 ms. The pulse train’s spectral envelope remains the same as the single  
211 pulse but its spectral fine structure becomes discrete with 100-Hz spacing (in this case, the  
212 maximum-amplitude frequency is 5 kHz with symmetrically decreasing-amplitude components  
213 at 4.9, 4.8, 4.7... and 5.1, 5.2, 5.3... kHz, respectively, see inset in the right panel). For the *GET-*  
214 *adjacent* vocoder,  $D = \sqrt{2}\sigma = 7.0$  ms, while for the *GET-overlap* vocoder,  $D = \sqrt{2}\sigma = 1.2$  ms.

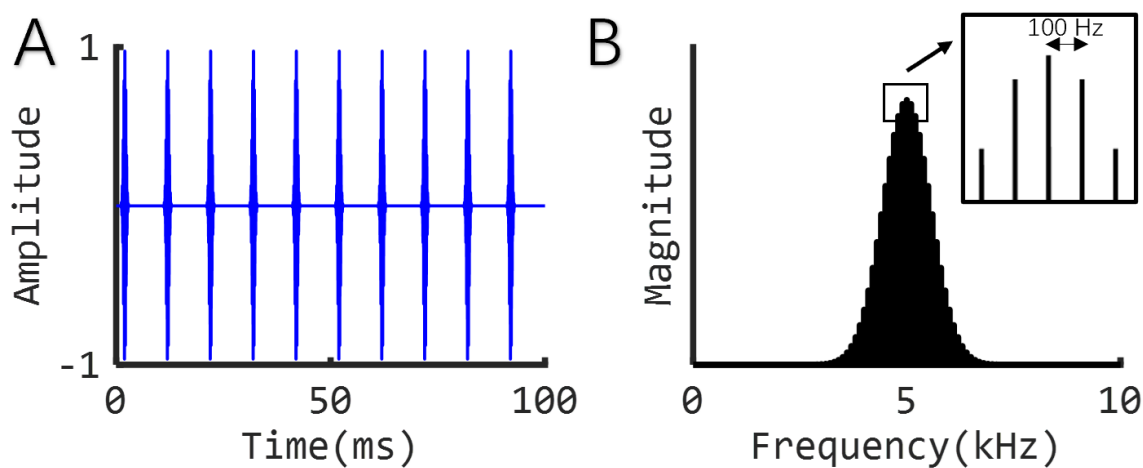

**FIG. 4.** (Color online) A 100-Hz pulse train, repeating the single pulse every 10 ms, in both the time (left panel) and frequency (right panel) domains. The parameters of the individual pulses are the same as those in Fig. 2.

215

216 CI stimulation were simulated using five different vocoders, i.e., *sine-wave*, *noise-*  
217 *adjacent*, *noise-overlap*, *GET-adjacent*, and *GET-overlap*. The numbers of channels tested were  
218 2, 4, 8, 16, and 32. Six normal hearing (NH) participants, ages 18-21, were tested in an anechoic  
219 chamber (IAC) using the English vowel and consonant recognition tests adopted from [Friesen et](#)  
220 [al., \(2001\)](#). There were 12 medial vowels and 14 medial consonants in the vowel and consonant  
221 tests respectively. Fig. 5 demonstrates some 16-channel vocoded stimuli for vowel tests.

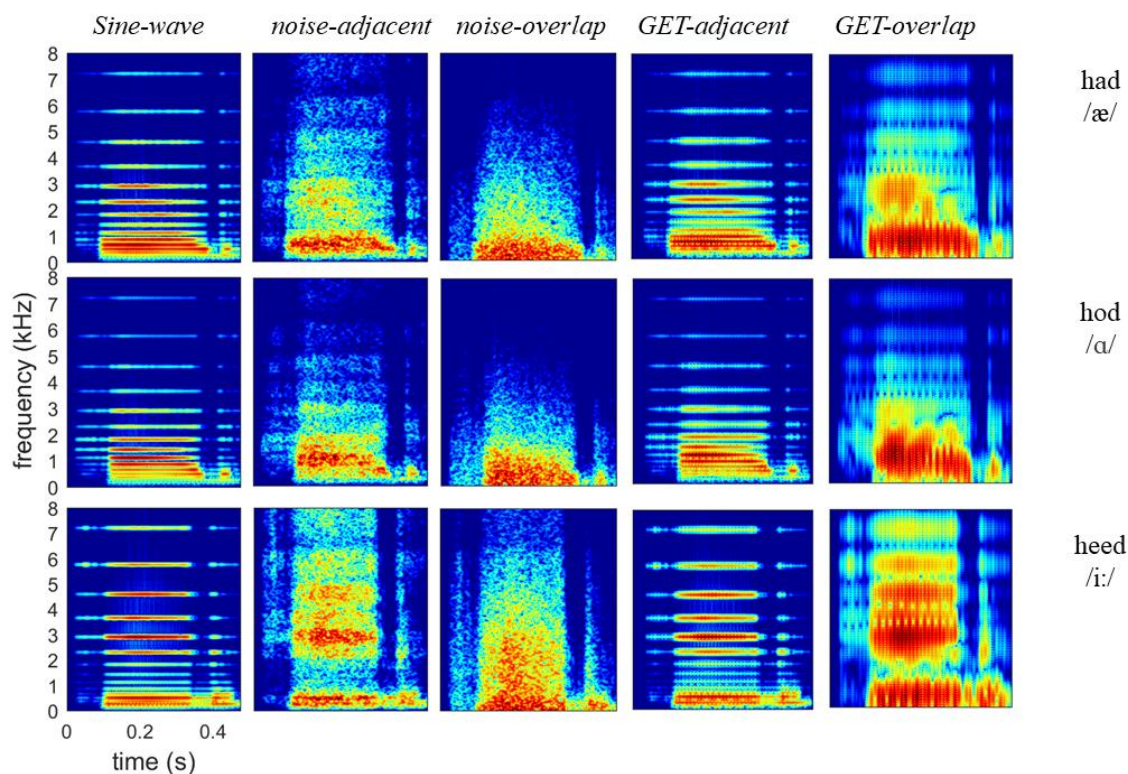

222 **FIG. 5.** (Color online) Spectrograms of three vowel stimuli encoded by the *sine-wave*,  
*noise-adjacent*, *noise-overlap*, *GET-adjacent*, and *GET-overlap* vocoders with 16 channels.

223 Each stimulus was presented 10 times. Stimuli were presented through headphones (HDA  
224 200, Sennheiser), and the sound level was calibrated to 70 dB SPL. This procedure was  
225 conducted following procedures approved by the University of California Irvine Institutional  
226 Review Board.

## 227 C. Experiment 2. Simulation of the $n$ -of- $m$ strategy ACE

### 228 1. Method theory: electrodiagram to vocoded sound mapping

229 The GETs are also applicable for directly transferring any pulsatile CI electrodiagram to  
230 pulsatile vocoded sound. To be more illustrative, Fig. 6A demonstrates a 10-channel  
231 electrodiagram. (Note: single vertical lines are used to represent electric pulses so that the  
232 amplitude and timing of the electric pulse can be represented, while the phase and gap durations  
233 in the common bi-phasic electric pulses are not considered in this model.) To generate a GET  
234 vocoder, the 10 channels were converted into frequency bands spanning over 10 equally divided  
235 parts of the basilar membrane between characteristic frequencies of 150 and 8000 Hz  
236 (Greenwood, 1990). Then, a band-specific GET pulse was generated by setting the parameters  
237 in equation (1) as  $a = 1$ ,  $t_0 = 0$ , and

$$238 \quad \sigma = \frac{2}{f_c} \quad (5)$$

239 where  $f_c$  denotes the center frequency of the specific band. As a result, the band-specific GET  
240 pulse had a 6.82-dB duration of

$$241 \quad D = \sqrt{2}\sigma = \frac{2\sqrt{2}}{f_c} \quad (6)$$

242 and a 6.82-dB bandwidth of

$$243 \quad B = \frac{1}{D} = \frac{\sqrt{2}}{4} f_c \quad (7)$$

244 Then the acoustic GET train at the  $k^{\text{th}}$  channel in Fig.6B is derived by

$$245 \quad p_{a,k}(t) = (p_{e,k}(t) * e^{-\frac{\pi t^2}{2\sigma^2}}) \cdot \sin(2\pi f_c t + \varphi_0) \quad (8)$$



246 where  $p_{e,k}(t)$  and  $p_{a,k}(t)$  denotes the electric and acoustic pulse trains in Fig.6A and 6B  
247 respectively, “\*” denotes a convolution calculation,  $\sigma$  and  $f_c$  are channel-dependent  
248 parameters as defined above, and  $\varphi_0$  is an initial phase that could be arbitrarily defined and  
249 was uniformly randomized between 0 and  $2\pi$ .

250 Fig. 6B shows the 10-channel GET pulse trains, which have temporally separated  
251 waveforms for high-frequency channels, but overlapping waveforms for low-frequency  
252 channels. Fig. 6C shows the overall waveform summed from the 10 bands.

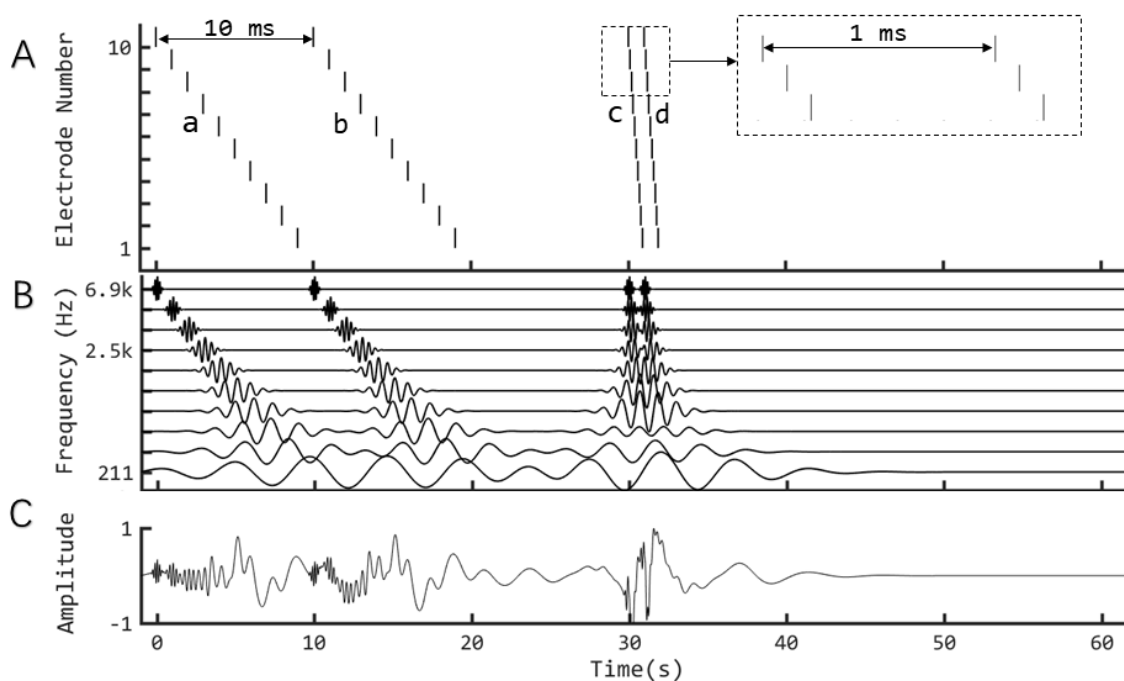

**FIG. 6.** Mapping a CI electrodiagram to a sound using a GET vocoder. **A.** A 10-channel CI electrodiagram, including two pulse sweeps with a 10-ms difference between **a** and **b**, as well as two additional sweeps with a 1-ms difference between **c** and **d**, corresponding to stimulation rates of 100 pps and 1000 pps, respectively. **B.** GET pulses mimicking the electric pulse trains. **C.** The final GET waveform resulting from the sum of ten band-specific GET pulses trains in B.

253

## 254 **2. Experiment method: Simulation of the *n-of-m* strategy ACE**

255 Using the above method, any electrograms including the widely used *n-of-m* strategy  
256 like Advanced Combinational Encoder (ACE) strategy, which is the present default strategy in  
257 Nucleus cochlear implants (Vandali *et al.*, 2000), can be converted to vocoded sounds.  
258 Following the preliminary results which showed comparable data between the ACE-GET  
259 vocoder and actual CI users (Kong *et al.*, 2019), in this paper a battery of speech perception  
260 tasks was carried out to further explore the potentials of ACE-GET vocoder on CI simulation.

261 In the clinical fitting of ACE strategy, the intensity dynamic range should be measured  
262 behaviorally electrode by electrode and is also limited and variable among users. In the ACE-  
263 GET vocoders, the dynamic range could be easily manipulated either in the compression stage  
264 of the ACE encoding or in the inverse compression stage of the GET synthesizing. The later  
265 way was used in this study and two dynamic ranges corresponding to two ACE-GET vocoders  
266 were tested. It was hypothesized that the vocoder with a higher dynamic range would simulate  
267 the top CI participants while the vocoder with a lower dynamic range would simulate the average  
268 performance CI participants. The combination of  $n = 8$  and  $m = 22$  is one default option in the  
269 clinical fitting of ACE and was simulated in this experiment.

270 In detail, two 22-ch ACE-GET vocoders (denoted by GET1 and GET2) were compared  
271 with two 22-ch sine-carrier standard vocoders (125 Hz and 250 Hz envelope cutoffs, denoted  
272 by Sin250 and Sin125 respectively) with minimum channel overlapping as shown in Fig. 1A.

273 *The detailed implementation methods of the vocoders:* First, an exponential function was  
274 used to transfer the electric current values to envelope power values. Then, single-sample pulse  
275 trains from each band were convolved with a Gaussian enveloped pulse with  $\sigma = 3/f_c$ . Then,  
276 the output was used to multiply a sinusoidal carrier with a frequency of  $f_c$  at the center of the



277 corresponding band and an arbitrary initial phase (a random initial phase in this study). The  
278 average power of each band was unchanged. Finally, the modulated signals were summed up to  
279 produce the vocoded stimulus.

280 The difference between GET1 and GET2 is only between their electric-to-acoustic  
281 mapping functions, which are Equation (9) and (10) respectively:

$$282 \quad L_a = \frac{1}{\alpha} ((1 + \alpha)^{L_e} - 1) \quad (9)$$

283 and

$$284 \quad L_a = \frac{1}{2.72\alpha} (e^{L_e}(1 + \alpha) - 1) \quad (10)$$

285 in which, the  $L_a$  denotes the recovered acoustic level,  $L_e$  denotes the electric current level  
286 defined by the electrodiagram from the ACE strategy based on a specific patient's fitting map,  
287 and  $\alpha$  is a constant 416.0. In the current study, the threshold levels and most comfortable levels  
288 are constantly defined as 100 and 255 CU (current unit), i.e.,  $100 \text{ CU} < L_e < 255 \text{ CU}$ . In this  
289 case, based on Equations (9) and (10), recovered acoustic level ranges were 32.7 dB and 5.3 dB  
290 for GET1 and GET2 respectively. Equation (9) is directly based on the default setting of the  
291 acoustic-to-electric compression function in ACE. Therefore, it was hypothesized that the GET1  
292 could simulate the best performance of CI listeners with the corresponding ACE strategy and  
293 GET2 would significantly degrade the performance because of the much narrower level range.  
294 Otherwise, the implementation details of the vocoder were the same as in [Meng \*et al.\* \(2018\)](#).

295 In the two sine vocoders, the frequency spacing for cutoffs for the analysis filters was  
296 defined in the range of [80, 7999] Hz according to a Greenwood map ([Greenwood, 1990](#)). The  
297 filtered signals were full-wave rectified and lowpass filtered (6th order Butterworth; 125 Hz for  
298 Sin125 and 250 Hz for Sin250) to extract the envelope for each channel. A sine wave with a  
299 frequency centered at the corresponding analysis band was used as the carrier, which was then

300 multiplied by the corresponding envelope. The final vocoded stimuli were generated by a  
301 summation of the modulated carriers. It was hypothesized that speech intelligibility would be  
302 better with a higher cutoff frequency in the envelope extraction (Souza and Rosen, 2009), i.e.,  
303 Sin250 better than Sin125. Both Sin250 and Sin125 vocoder simulation results were  
304 hypothesized to be better than those of most CI listeners.

305 In Fig. 7, a Mandarin sentence is used to demonstrate the vocoded speech using the four  
306 vocoders, i.e., Sin250, Sin125, GET1, and GET2. It shows that the GET vocoders ensembles  
307 the ACE-electrodiagram more than the sine vocoders. It was hypothesized that the speech  
308 intelligibility would be worse but closer to actual CI results with the GET vocoders than with  
309 the sine vocoders.

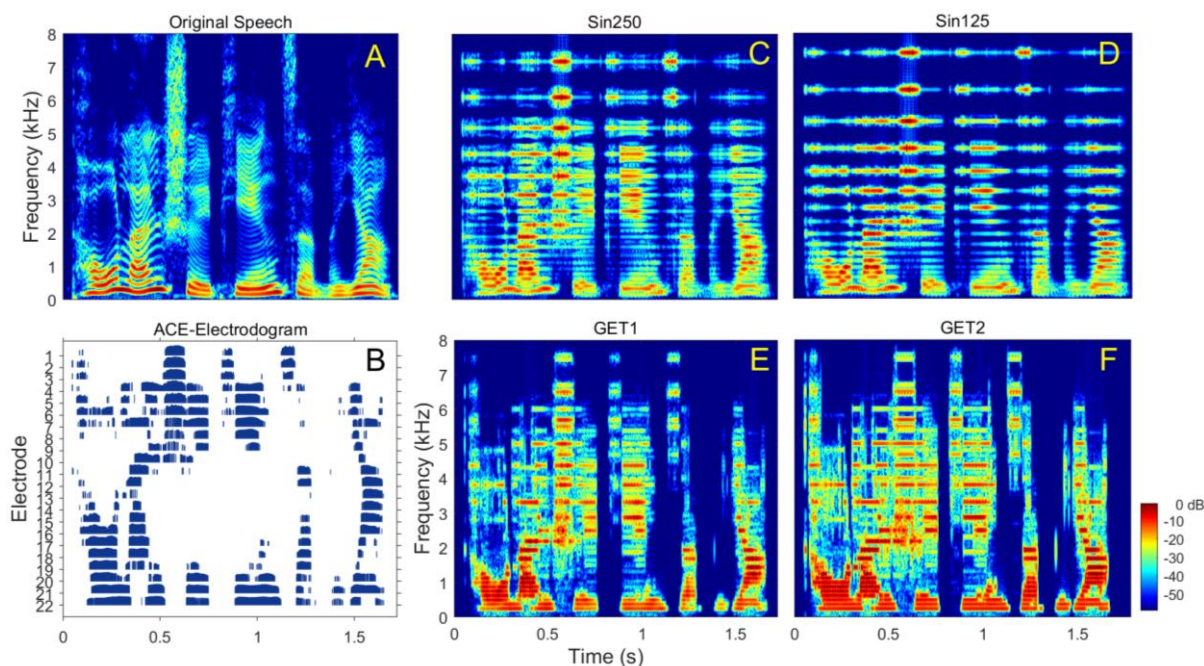

**FIG. 7.** (Color online) Speech stimulus demonstrations for the ACE simulation experiment. **A.** Spectrogram of a clear sentence speech. **B.** Electrodiagram based on an ACE strategy for the original speech. **C-F.** Spectrograms for vocoded speech using Sin250, Sin125, GET1, and GET2 vocoders respectively.

310

311 **3. Experiment method: Participants and Tasks**

312 Two groups of NH participants (ten in each group, ages 18-29, and native Mandarin  
313 speakers) were tested in a soundproof room. Group 1 used Sin250 and GET1, and Group 2 used  
314 Sin125 and GET2. Three Mandarin Chinese recognition tasks were tested, i.e., time-  
315 compression threshold, sentence in noise recognition, sentence in reverberation recognition. The  
316 results for the four tasks with the two vocoders in these NH participants were compared with  
317 actual CI results from the first author's previous experiments (Meng *et al.*, 2019) as well as  
318 some newly collected data in this work. These experiments were conducted following  
319 procedures approved by the Medical Ethics Committee of Shenzhen University, China. Detailed  
320 information about the three experiments is as follows:

321 1) Time-compression thresholds (TCTs), i.e., accelerated sentence speeds at which 50% of  
322 words could be recognized correctly, were measured using the Mandarin speech perception  
323 corpus (Fu *et al.*, 2011).

324 2) Speech reception thresholds (SRTs) in speech-shaped noise (SSN) and babble noise, i.e.,  
325 signal-to-noise ratio (SNR) at which 50% of words could be recognized correctly, were  
326 measured using the Mandarin hearing in noise test (MHINT) corpus (Wong *et al.*, 2007). The  
327 TCT and SRT test procedures followed Experiment 2 of Meng *et al.*, (2019) exactly, in which  
328 ten CI subjects (9/10 adults) with various hearing histories were tested.

329 3) Recognition of speech in reverberation was measured using a Mandarin BKB-like  
330 sentence corpus (Xi *et al.*, 2012), whose quiet sentences were convolved with simulated room  
331 impulse responses (RIRs). The RIRs were generated using a MATLAB function  
332 (<https://www.audiolabs-erlangen.de/fau/professor/habets/software/rir-generator>) with its default  
333 setting, except the reverberation times (T60) were set as 0, 0.3, 0.6, and 0.9 s. For each T60, one

334 sentence list was used. Seven CI participants with various hearing histories were also tested for  
335 comparison (See Table I).

336 **TABLE I. Detailed information of the seven CI participants in the speech in reverberation**  
337 **test**

| Subject | Gender | Age range<br>(yr) | CI<br>(yr) | Experience | CI Processor | Etiology           |
|---------|--------|-------------------|------------|------------|--------------|--------------------|
| C14     | F      | 41-45             |            | 12         | CP810        | Drug induced       |
| C23     | M      | 31-35             |            | 11         | CP810        | Sudden<br>deafness |
| C30     | M      | 11-15             |            | 10         | Freedom      | LVAS               |
| M5      | M      | 16-20             |            | 15         | OPUS-2       | Virus infection    |
| C16     | F      | 21-25             |            | 2          | Freedom      | Unknown            |
| M17     | F      | 16-20             |            | 5          | OPUS-2       | Genetic            |
| M16     | F      | 16-20             |            | 7          | OPUS-2       | Unknown            |

338 The paired-sample *t*-test and two-sample *t*-test functions in MATLAB, i.e., `ttest.m` and  
339 `ttest2.m`, were used to examine the statistical significance of the means' difference for within-  
340 subject comparisons and inter-subject comparisons respectively. A criterion of  $p < 0.05$  was  
341 used for indicating a significant difference.

### 342 **III. RESULTS**

#### 343 **A. Experiment 1**

344 Results are shown in Figure 8. For the vowel test, the six NH participants scored  
345 approximately 20% under all simulation conditions with two channels. Increasing the number

346 of channels also increased performance. With eight channels, performance under the different  
347 conditions began to separate. The sine-wave vocoder outperformed actual CI data (adapted from  
348 [Friesen et al., \(2001\)](#)), which showed no improvement beyond 8 channels. A *noise-adjacent*  
349 vocoder and a *GET-adjacent* vocoder showed similar performance trends. When electrode  
350 interaction was simulated with overlapping filters, the subject performance showed a plateau  
351 near 60% with noise overlap, similar to actual CIs. The Gaussian overlap condition  
352 underperformed CI data in this case, saturating near 35% with eight channels.

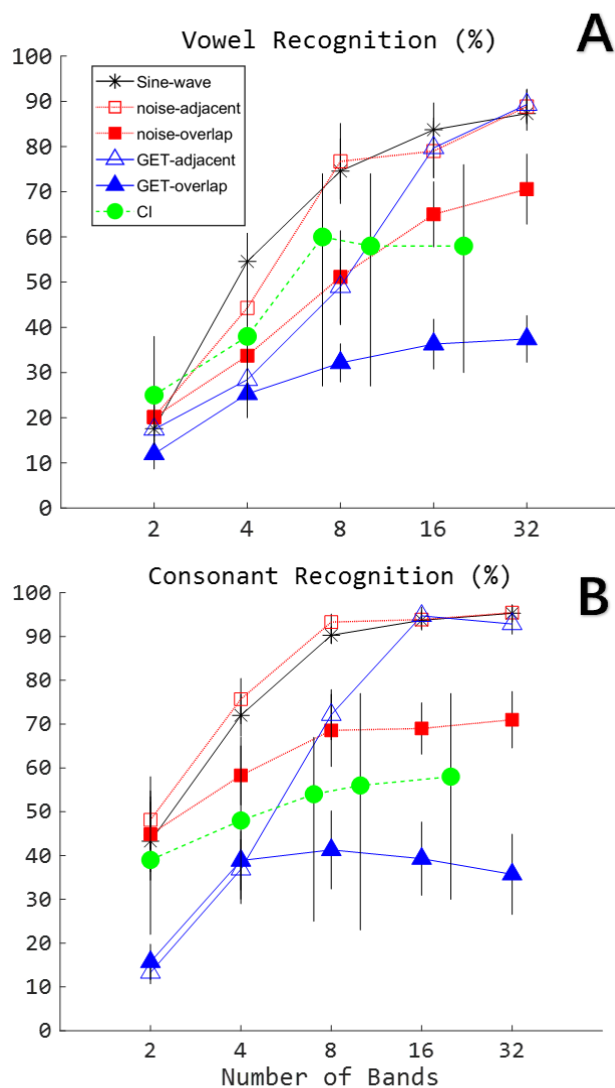

**FIG. 8.** (Color online) Vowel recognition (A) and consonant (B) recognition as a function of number of bands (channels). Cochlear implant data is adapted from [Friesen et al., \(2001\)](#). Simulation data is averaged from 6 normal hearing subjects. For the simulation data, standard errors are indicated by the vertical bars. For the CI data, the bars show the entire ranges of performance across all of their 19 participants.

353

354 Consonant recognition showed similar performance trends across the simulation types,  
355 with *sine-wave*, *noise-adjacent*, and *GET-adjacent* outperforming CIs (adapted from [Friesen et](#)  
356 [al. \(2001\)](#)) when there were eight or more channels simulated. *Noise-overlap* brought the  
357 performance closer to actual CI data, while again, *GET-overlap* underperformed CIs. With only  
358 two channels, both *GET-adjacent* and *GET-overlap* showed performances that were much lower  
359 than actual CIs.

360 The results suggest that it is feasible to simulate current spread by manipulating durations  
361 of GET pulses. In both noise vocoder and GET vocoder, performance was substantially  
362 degraded by the increased current spread in both tasks. With eight or more bands, GET vocoders  
363 showed better simulation performance than the sine-wave and noise vocoders in that the actual  
364 CI data fell in the range between the adjacent and overlap versions of the GETs.

## 365 **B. Experiment 2**

366 The results with the four 22-ch vocoders, i.e., GET1, GET2, Sin250, and Sin125 are shown  
367 in Fig. 9. **(A)** For the TCT test, a significant decreasing trend was found from Sin250 (mean =  
368 16.1 syllables/sec), Sin125 (13.9), GET1 (12.3), GET2 (9.4), to actual CI (6.8) results, while  
369 their standard deviations are comparable within the range from 1.0 to 1.2 syllables/s. **(B)** For the  
370 SRT test, there was no significant difference between Sin250 (means: -4.7 dB in SSN and -0.1  
371 dB in babble noise) and Sin125 (means: -4.8 dB in SSN and -0.1 dB in babble noise) and  
372 between GET2 (means: 5.6 dB in SSN and 10 dB in babble noise) and actual CIs (means: 6.5  
373 dB in SSN and 8.8 dB in Babble noise). The mean results with GET1 (means: -1.5 dB in SSN  
374 and 4.5 dB in babble noise) were significantly lower than those with Sin250 and Sin125 and  
375 significantly higher than those with GET2 and CIs. The mean SRTs in babble noise were always

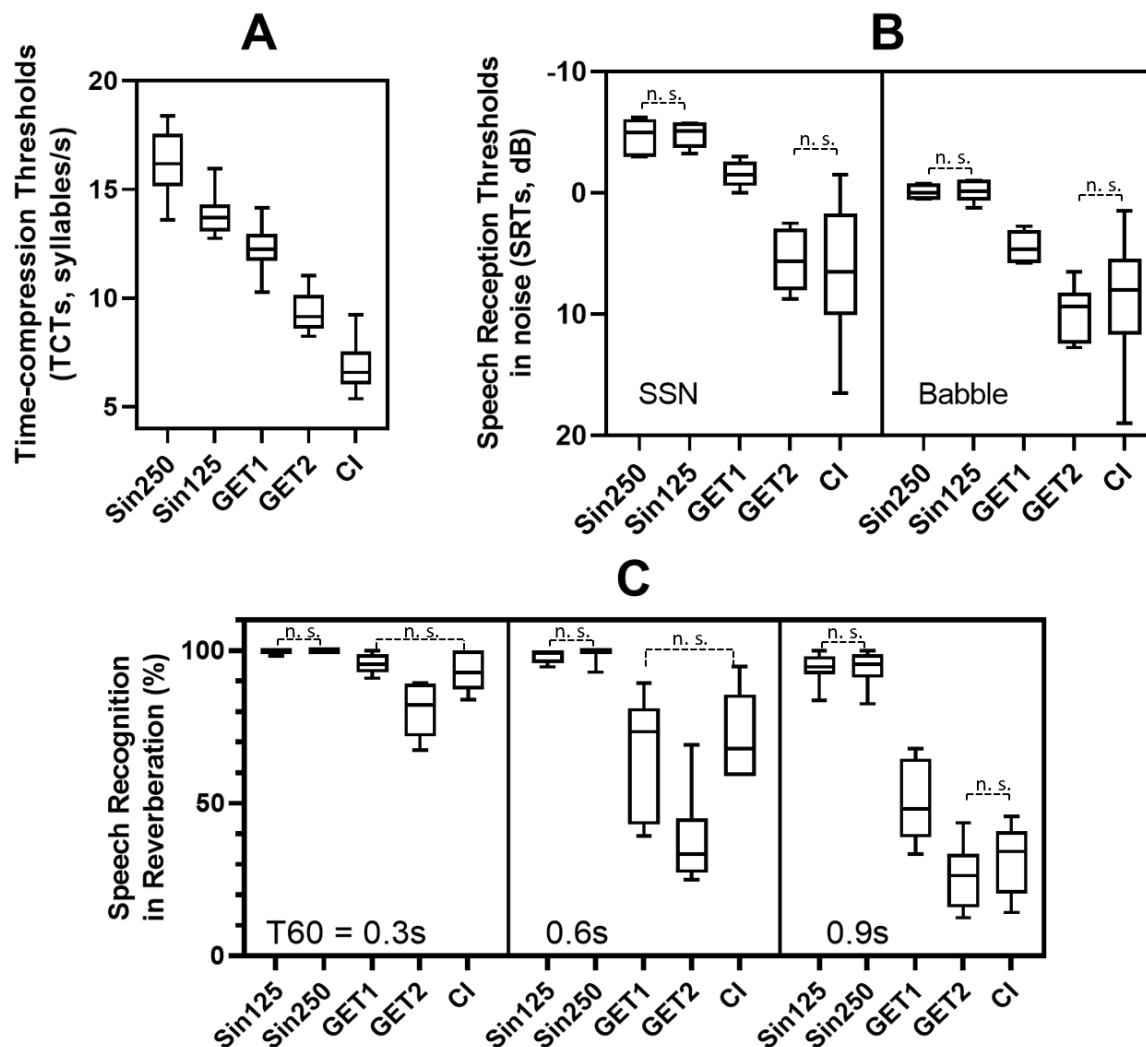

**FIG. 9.** Results from three speech recognition tasks with two 22-ch sine-wave vocoders (Sin250: 250 Hz cut-off envelope; Sin125: 125 Hz cut-off envelope) and two GET vocoders (GET1 and GET2; their difference is only in the intensity dynamic range, i.e., 32.7 dB and 5.3 dB for GET1 and GET2 respectively) compared with the results of some CI subjects. There were two groups of normal-hearing participants, each with ten participants. One group used Sin250 and GET1, and the other group used Sin125 and GET2. **A.** Time-compression threshold results. **B.** Speech reception threshold results of a speech in (SSN and babble noise) noise recognition experiment. **C.** Speech recognition scores in reverberation with T60 = 0.3, 0.6, and 0.9s. Pair-wise comparisons were examined. In each sub-figure, “n. s.” denotes the non-significant difference ( $p \geq 0.05$ ), otherwise, there was a significant difference.



377 significantly lower than those in SSN for all five conditions. (C) For the reverberant speech  
378 recognition test, all vocoders and the actual CI condition showed a significant trend to face more  
379 difficulty when the reverberation time increased. However, the sine vocoder simulations were  
380 much less sensitive to reverberation than the CI users. It is showed that even with  $T60 = 0.9$  s,  
381 the sine vocoders still derived  $>94\%$  means, which were much higher than CI participants' 32%.  
382 The GET1 and GET2 derived significantly lower scores than the sine vocoders did. Under the  
383  $T60 = 0.3$  s and  $0.6$  s conditions, there was no significant mean score difference between GET1  
384 and CI, while GET2 derived significantly lower mean scores than GET1 and CI did. Under the  
385  $T60 = 0.9$  s condition, there was no significant mean score difference between GET2 and CI,  
386 while GET1 derived significantly higher mean scores than GET2 and CI did.

387 In all three tasks, GET vocoders were able to simulate the actual CI performance more  
388 closely than the sine vocoders. In fact, the sine vocoders overestimated the CI performance in  
389 all tasks. In the time-compression task, all vocoders produced better than CI performance with  
390 GET2 being the closest (Fig. 9A). In the SRT in noise test, GET2 and CI produced comparable  
391 performance (Fig. 9B). In the reverberation task, GET1 produced similar to CI performance in  
392 two conditions ( $T60 = 0.3$  and  $0.6$ s in Fig. 9C) and GET2 in the  $T60 = 0.9$ s condition (Fig. 9C).

#### 393 **IV. DISCUSSION**

394 This study introduced a novel vocoder that used Gaussian-envelope-tones to simulate not  
395 only the pulsatile nature of electric stimulation but also channel interaction and  $n$ -of- $m$  speech  
396 processing in modern CIs. The evaluation results showed that GET performance was generally  
397 more similar to the actual CI performance than the standard vocoders in all three speech  
398 intelligibility tasks. The following discussion focuses on CI simulations in terms of comparing  
399 GETs to single electric pulses, channel interactions, and future directions.



## 400 **A. GETs and electric pulses**

401       The GET pulse can be used to simulate a “perceivable” atom of sound, which can be traced  
402 back to [Gabor \(1947\)](#). In this model, each action potential from an auditory nerve fiber may  
403 correspond to a small amplitude GET pulse with the carrier set at the nerve fiber’s characteristic  
404 frequency, especially when the pulse rate is low (e.g., < 200 Hz). At the other end of the  
405 spectrum, the model can be a phenomenological one, where each GET pulse corresponds to a  
406 single perceivable unit of an electrical pulse. The amplitude of the GET pulse is scaled  
407 proportionally to the electrical stimulus’ current levels. It is also possible to closely approximate  
408 existing noise and sine-wave vocoders by using wide GET pulses and summing many pulses  
409 occurring at high rates (e.g., > 1000 Hz). Several works have proposed to generate pulsatile  
410 simulation using harmonic complex ([Churchill \*et al.\*, 2014](#)) or equally related frequency limited  
411 pulse trains ([Apoux \*et al.\*, 2018](#)). They used the periodicity cue generated from several  
412 harmonics for each channel, but the precise timing information of electric pulse cannot be  
413 simulated as the GET vocoders. With the studies that use filtered harmonic complexes ([McKay  
414 and Carlyon, 1999](#); [Deeks and Carlyon, 2004](#); [Churchill \*et al.\*, 2014](#)), a concern is that the  
415 individual components of the harmonics can be resolved. The GET can be used as a generic tool  
416 of CI simulation. Main features in CIs can be independently manipulated: the place of  
417 stimulation, pulse time, temporal envelope, spectral envelope and spectral interaction, intensity  
418 quantization and maxima-selection, by corresponding features of the acoustic pulses.

## 419 **B. Channel interactions**

420       Channel interactions is one factor underlying the poor- and large-variance performance for  
421 CI participants, which has also been corroborated by several previous studies ([Fu and Nogaki,  
422 2005](#); [Bingabr \*et al.\*, 2008](#); [Strydom and Hanekom, 2011](#); [Grange \*et al.\*, 2017](#); [O’Neill \*et al.\*,](#)

423 [2019; Mehta \*et al.\*, 2020](#)). In both the standard and GET vocoders, channel interactions can be  
424 modeled by varying the overlap and slope of the analysis and synthesis filter banks. Different  
425 from the noise- or sine-vocoders that produced performance better than actual CI performance  
426 even in the case of the maximal channel interaction, the GET vocoder produced a wide range of  
427 performance encompassing the actual CI performance (Figs. 8 and 9).

428 In addition to channel interaction, distorted frequency mapping may play a role in the  
429 discrepancy of simulation to actual CI performance ([Shannon \*et al.\*, 1998](#)). The frequency-  
430 shifted simulations were not tested here. However, an upward frequency-shifting is also possible  
431 with GETs, which are able to further reduce temporal interaction at higher tone frequencies (Figs.  
432 3 and 6).

### 433 **C. Limitation and future directions**

434 An inherent limitation with the GETs is the tradeoff between temporal duration and spectral  
435 bandwidth. Shortening the pulse duration increases the spectral bandwidth; thus, lower carrier  
436 frequencies have stricter limits. The real CIs have no such limitation, in which both pulse  
437 duration and pulse rate are the same whether it is a basal or apical electrode.

438 Similar to the sine- or noise-excited vocoders, the GET also discarded the fine structure (e.  
439 g., the bi-phasic waveform and the inter-phase gap) of the pulses in the present  
440 implementation. The GET simulation performance on F0 or pitch cues in CIs has not been  
441 considered yet. Any improvement is of course limited by the trade-off between temporal and  
442 spectral representation. Future studies may explore discrete tones with different envelopes, e.g.,  
443 Gammatones ([de Boer, 1975](#); [Patterson \*et al.\*, 1987](#); [Ausili \*et al.\*, 2019](#)). Gammatones are similar  
444 in shape to a Gaussian envelope but is asymmetrical with a longer tail.

445           Regardless of different types of simulation, they all are able to produce good speech  
446 performance similar or better than that by modern multi-channel cochlear implant users. This  
447 high level of performance re-confirms the classic ideas dating back to Dudley and Fant that  
448 while speech quality is affected by different carriers or sound sources, speech intelligibility is  
449 determined by the slowly-varying envelope cues controlled by the vocal tract.

## 450 **V. CONCLUSION**

451           Here we used Gaussian-Enveloped-Tones (GETs) to develop a novel vocoder that  
452 simulates pulsatile electric stimulation in cochlear implants. Parametric analysis and systematic  
453 evaluation led to the following conclusions:

454           (1) GETs have produced a more realistic CI performance in speech intelligibility compared  
455 to the traditional vocoder simulations.

456           (2) Similar to the traditional vocoders, GETs are also able to simulate spectral channel  
457 interactions to produce asymptotical performance in consonant and vowel recognition beyond  
458 4-7 channels.

459           (3) GETs can simulate both temporal and spectral aspects of modern CIs from discrete  
460 representation of information on a pulse-by-pulse basis in a single electrode to multi-channel  
461 speech processing such as the  $n$ -of- $m$  strategy.

## 462 **ACKNOWLEDGMENTS**

463           We thank all the participants in these experiments. J. Carroll and S. Tiaden helped collect the data  
464 in Experiment 1. F. Kong and Y. Xiao helped collect the data in Experiment 2. This research was  
465 supported by NIH R01 DC15587 (F.G.Z.), National Natural Science Foundation of China (11704129  
466 and 61771320), Guangdong Basic and Applied Basic Research Foundation Grant (2020A1515010386),  
467 and Science and Technology Program of Guangzhou (202102020944) (Q.M.).

468 **REFERENCES**

469 Apoux, F., Carter, B. L., and Healy, E. W. (2018). "Effect of dual-carrier processing on the  
470 intelligibility of concurrent vocoded sentences," *J. Speech. Lang. Hear. Res.* **61**, 2804-2813.

471 Ausili, S. A., Backus, B., Agterberg, M. J., van Opstal, A. J., and van Wanrooij, M. M. (2019).  
472 "Sound localization in real-time vocoded cochlear-implant simulations with normal-hearing  
473 listeners". *Trend. Hear.* **23**, 1-18.

474 Bernstein, L. R., and Trahiotis, C. (2002). "Enhancing sensitivity to interaural delays at high  
475 frequencies by using "transposed stimuli"," *J. Acoust. Soc. Am.* **112**, 1026-1036.

476 Bingabr, M., Espinoza-Varas, B., and Loizou, P. C. (2008). "Simulating the effect of spread of  
477 excitation in cochlear implants," *Hear. Res.* **241**, 73-79.

478 Blamey, P. J., Dowell, R. C., Tong, Y. C., Brown, A. M., Luscombe, S. M., & Clark, G. M. (1984a).  
479 Speech processing studies using an acoustic model of a multiple-channel cochlear implant. *J.*  
480 *Acoust. Soc. Am.* **76**(1), 104-110.

481 Blamey, P. J., Dowell, R. C., Tong, Y. C., & Clark, G. M. (1984b). An acoustic model of a  
482 multiple-channel cochlear implant. *J. Acoust. Soc. Am.* **76**(1), 97-103.

483 Buell, T. N., & Hafter, E. R. (1988). Discrimination of interaural differences of time in the  
484 envelopes of high-frequency signals: Integration times. *J. Acoust. Soc. Am.*, **84**(6), 2063-2066.

485 Chen, H., Ishihara, Y. C., and Zeng, F. G. (2005). "Pitch discrimination of patterned electric  
486 stimulation," *J. Acoust. Soc. Am.* **118**, 338-345.

487 Churchill, T. H., Kan, A., Goupell, M. J., Ihlefeld, A., and Litovsky, R. Y. (2014). "Speech  
488 perception in noise with a harmonic complex excited vocoder," *J. Assoc. Res. Otolaryngol.* **15**,  
489 265-278.

- 490 de Boer, E. (1975). "Synthetic whole-nerve action potentials for the cat," *J. Acoust. Soc. Am.* **58**,  
491 1030-1045.
- 492 Deeks, J. M., and Carlyon, R. P. (2004). "Simulations of cochlear implant hearing using filtered  
493 harmonic complexes: implications for concurrent sound segregation," *J. Acoust. Soc. Am.* **115**,  
494 1736-1746.
- 495 Dorman, M. F., Loizou, P. C., and Rainey, D. (1997). "Speech intelligibility as a function of the  
496 number of channels of stimulation for signal processors using sine-wave and noise-band outputs,"  
497 *J. Acoust. Soc. Am.* **102**, 2403-2411.
- 498 Dudley, H. (1939). "Remaking speech," *J. Acoust. Soc. Am.* **11**, 169-177.
- 499 Fant, G. (1970). "Acoustic theory of speech production". Walter de Gruyter.
- 500 Friesen, L. M., Shannon, R. V., Baskent, D., and Wang, X. (2001). "Speech recognition in noise  
501 as a function of the number of spectral channels: comparison of acoustic hearing and cochlear  
502 implants," *J. Acoust. Soc. Am.* **110**, 1150-1163.
- 503 Fu, Q. J., Zhu, M., and Wang, X. (2011). "Development and validation of the Mandarin speech  
504 perception test," *J. Acoust. Soc. Am.* **129**, L267-L273.
- 505 Fu, Q. J., and Nogaki, G. (2005). "Noise susceptibility of cochlear implant users: the role of  
506 spectral resolution and smearing," *J. Assoc. Res. Otolaryngol.* **6**, 19-27.
- 507 Gabor, D. (1947). "Acoustical quanta and the theory of hearing," *Nature.* **159**, 591-594.
- 508 Goupell, M. J., Stoelb, C., Kan, A., and Litovsky, R. Y. (2013). "Effect of mismatched place-of-  
509 stimulation on the salience of binaural cues in conditions that simulate bilateral cochlear-implant  
510 listening," *J. Acoust. Soc. Am.* **133**, 2272-2287.

- 511 Grange, J. A., Culling, J. F., Harris, N., and Bergfeld, S. (2017). "Cochlear implant simulator with  
512 independent representation of the full spiral ganglion," J. Acoust. Soc. Am. **142**, L484.
- 513 Greenwood, D. D. (1990). "A cochlear frequency-position function for several species--29 years  
514 later," J. Acoust. Soc. Am. **87**, 2592-2605.
- 515 Hartmann, R., Topp, G., and Klinke, R. (1984). "Discharge patterns of cat primary auditory fibers  
516 with electrical stimulation of the cochlea," Hear. Res. **13**, 47-62.
- 517 Hilkuysen, G., and Macherey, O. (2014). "Optimizing pulse-spreading harmonic complexes to  
518 minimize intrinsic modulations after auditory filtering," J. Acoust. Soc. Am. **136**, 1281.
- 519 Johnson, L. A., Santana C. C. D., and Wang X. (2017) "Representations of time-varying cochlear  
520 implant stimulation in auditory cortex of awake marmosets (*Callithrix jacchus*)." J. Neurosci. **37**,  
521 7008-7022.
- 522 Kan, A., Stoelb, C., Litovsky, R. Y., and Goupell, M. J. (2013). "Effect of mismatched place-of-  
523 stimulation on binaural fusion and lateralization in bilateral cochlear-implant users," J. Acoust.  
524 Soc. Am. **134**, 2923-2936.
- 525 Kong, F., Wang, X., Teng, X., Zheng, N., Yu, G., and Meng, Q., (2019). "Reverberant speech  
526 recognition with actual cochlear implants: verifying a pulsatile vocoder simulation method," in  
527 *Proceedings of the 23<sup>rd</sup> International Congress on Acoustics*, pp. 3109-3112.
- 528 Lu, T., Carroll, J., and Zeng, F. G. (2007). "On acoustic simulations of cochlear implants," in  
529 *Conference on Implantable Auditory Prostheses (abstract)* (Lake Tahoe, CA).
- 530 Lu, T., Litovsky, R., and Zeng, F. G. (2010). "Binaural masking level differences in actual and  
531 simulated bilateral cochlear implant listeners," J. Acoust. Soc. Am. **127**, 1479-1490.

- 532 McKay, C. M., and Carlyon, R. P. (1999). "Dual temporal pitch percepts from acoustic and electric  
533 amplitude-modulated pulse trains," *J. Acoust. Soc. Am.* **105**, 347-357.
- 534 Mehta, A. H., Lu, H., & Oxenham, A. J. (2020). "The perception of multiple simultaneous pitches  
535 as a function of number of spectral channels and spectral spread in a noise-excited envelope  
536 vocoder". *J. Assoc. Res. Otolaryngol.*, **21**(1), 61-72.
- 537 Meng, Q., Wang, X., Cai, Y., Kong, F., Buck, A. N., Yu, G., Zheng, N., and Schnupp, J. (2019).  
538 "Time-compression thresholds for Mandarin sentences in normal-hearing and cochlear implant  
539 listeners," *Hear. Res.* **374**, 58-68.
- 540 Meng, Q., Yu, G., Wan, Y., Kong, F., Wang, X., and Zheng, N. (2018). "Effects of vocoder  
541 processing on speech perception in reverberant classrooms," in *2018 Asia-Pacific Signal and  
542 Information Processing Association Annual Summit and Conference (APSIPA ASC)*, pp. 761-765.
- 543 Mesnildrey, Q., Hilkuysen, G., and Macherey, O. (2016). "Pulse-spreading harmonic complex as  
544 an alternative carrier for vocoder simulations of cochlear implants," *J. Acoust. Soc. Am.* **139**, 986-  
545 991.
- 546 Nelson, D. A., Donaldson, G. S., and Kreft, H. (2008). "Forward-masked spatial tuning curves in  
547 cochlear implant users," *J. Acoust. Soc. Am.* **123**, 1522-1543.
- 548 O'Neill, E. R., Kreft, H. A., and Oxenham, A. J. (2019). "Speech perception with spectrally non-  
549 overlapping maskers as measure of spectral resolution in cochlear implant users," *J. Assoc. Res.*  
550 *Otolaryngol.* **20**, 151-167.
- 551 Patterson, R. D., Nimmo-Smith, I., Holdsworth, J., and Rice, P. (1987). "An efficient auditory  
552 filterbank based on the gammatone function," in *a meeting of the IOC Speech Group on Auditory  
553 Modelling at RSRE.*

- 554 Ruggero, M. A., and Rich, N. C. (1983). "Chinchilla auditory-nerve responses to low-frequency  
555 tones," *J. Acoust. Soc. Am.* **73**, 2096-2108.
- 556 Shannon, R. V., Zeng, F. G., Kamath, V., Wygonski, J., and Ekelid, M. (1995). "Speech  
557 recognition with primarily temporal cues," *Science*. **270**, 303-304.
- 558 Shannon, R. V., Zeng, F. G., and Wygonski, J. (1998). "Speech recognition with altered spectral  
559 distribution of envelope cues," *J. Acoust. Soc. Am.* **104**, 2467-2476.
- 560 Singh, S., Kong, Y. Y., and Zeng, F. G. (2009). "Cochlear implant melody recognition as a  
561 function of melody frequency range, harmonicity, and number of electrodes," *Ear and Hearing*, **30**,  
562 160-168.
- 563 Skinner, M. W., Holden, L. K., Holden, T. A., Dowell, R. C., Seligman, P. M., Brimacombe, J. A.,  
564 and Beiter, A. L. (1991). "Performance of postlinguistically deaf adults with the wearable speech  
565 processor (WSP III) and mini speech processor (MSP) of the Nucleus multi-electrode cochlear  
566 implant," *Ear. Hear.* **12**, 3-22.
- 567 Skinner, M. W., Holden, L. K., Whitford, L. A., Plant, K. L., Psarros, C., & Holden, T. A. (2002).  
568 "Speech recognition with the nucleus 24 SPEAK, ACE, and CIS speech coding strategies in newly  
569 implanted adults," *Ear and hearing*, **23**, 207-223.
- 570 Strydom, T. and Hanekom, J. J. (2011). "An analysis of the effects of electrical field interaction  
571 with an acoustic model of cochlear implants," *J. Acoust. Soc. Am.* **129**, 2213-2226.
- 572 Souza, P. and Rosen, S. (2009). "Effects of envelope bandwidth on the intelligibility of sine-and  
573 noise-vocoded speech". *J. Acoust. Soc. Am.*, **126**(2), 792-805.



- 574 Svirsky, M. A., Capach, N. H., Neukam, J. D., Azadpour, M., Sagi, E., Hight, A. E., ... & Fitzgerald,  
575 M. B. (2021). Valid acoustic models of cochlear implants: One size does not fit all. *Otology &*  
576 *Neurotology*, **42**, S2-S10.
- 577 Tong, Y. C., Clark, G. M., Seligman, P. M., and Patrick, J. F. (1980). Speech processing for a  
578 multiple-electrode cochlear implant hearing prosthesis. *J. Acoust. Soc. Am.*, **68**(6), 1897-1899.
- 579 van Schijndel, N. H., Houtgast, T., and Festen, J. M. (1999). "Intensity discrimination of Gaussian-  
580 windowed tones: indications for the shape of the auditory frequency-time window," *J. Acoust. Soc.*  
581 *Am.* **105**, 3425-3435.
- 582 Vandali, A. E., Whitford, L. A., Plant, K. L., and Clark, G. M. (2000). "Speech perception as a  
583 function of electrical stimulation rate: using the Nucleus 24 cochlear implant system," *Ear. Hear.*  
584 **21**, 608-624.
- 585 Wilson, B. S., Finley, C. C., Lawson, D. T., Wolford, R. D., Eddington, D. K., Rabinowitz, W. M.  
586 (1991). "Better speech recognition with cochlear implants," *Nature*. **352**, 236-238.
- 587 Wong, L. L., Soli, S. D., Liu, S., Han, N., and Huang, M. W. (2007). "Development of the  
588 Mandarin Hearing in Noise Test (MHINT)," *Ear. Hear.* **28**, 70S-74S.
- 589 Xi, X., Ching, T. Y., Ji, F., Zhao, Y., Li, J. N., Seymour, J., Hong, M. D., Chen, A. T., and Dillon,  
590 H. (2012). "Development of a corpus of Mandarin sentences in babble with homogeneity  
591 optimized via psychometric evaluation," *Int. J. Audiol.* **51**, 399-404.
- 592 Xu, L., Thompson, C. S., and Pfungst, B. E. (2005). "Relative contributions of spectral and  
593 temporal cues for phoneme recognition," *J. Acoust. Soc. Am.*, **117**, 3255-3267.
- 594 Zeng, F. G. (2017). "Challenges in improving cochlear implant performance and accessibility".  
595 *IEEE Transactions on Biomedical Engineering*, **64**, 1662-1664.

596 Zeng, F. G., Rebscher, S., Harrison, W., Sun, X., & Feng, H. (2008). “Cochlear implants: system  
597 design, integration, and evaluation”. *IEEE Reviews in Biomedical Engineering*, **1**, 115-142.

598
